# Supplementary material for: Dietary Sodium Restriction and Frailty among Middle-Aged and Older Adults: An 8-Year Longitudinal Study
Source: MDPI journal article supplement (doi:10.3390/nu16050580), 2024-02-20
Supplement: s1 [file s1]

## Supplementary information

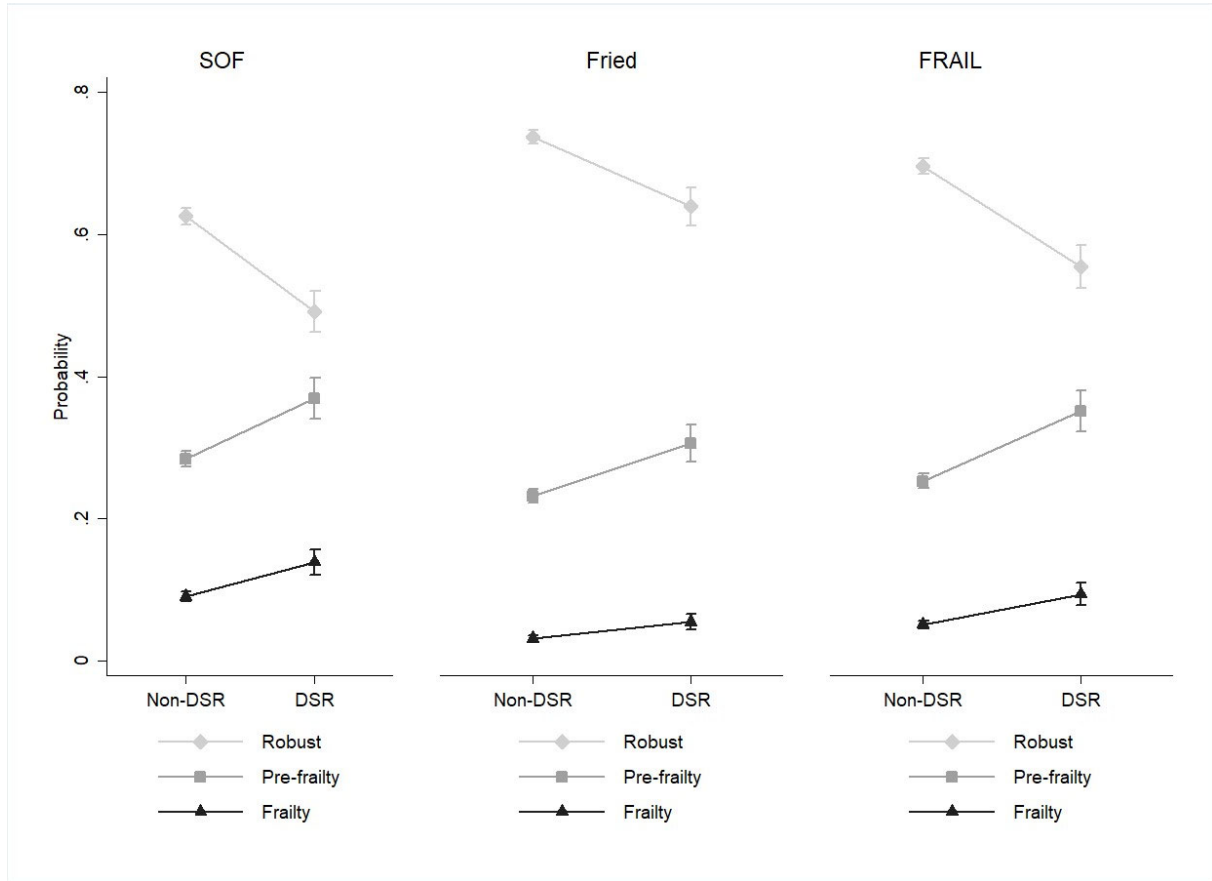

**Figure S1.** The effects of DSR on the probability of the robust, pre-frailty, and frailty group among middle-aged and older adults, Taiwan, 1999–2007

*Note:* All results were based on random-effects panel logit model. The data points represent the mean  $\pm$  standard error. AOR: adjusted odds ratio; DSR: dietary sodium restriction. Probability(pre-frailty) (SOF): DSR: 0.37<sup>\*\*\*</sup>, CI = 0.34–0.40; Non-DSR: 0.28<sup>\*\*\*</sup>, CI = 0.27–0.29; Probability(pre-frailty) (Fried): DSR: 0.31<sup>\*\*\*</sup>, CI = 0.28–0.33; Non-DSR: 0.23<sup>\*\*\*</sup>, CI = 0.22–0.24; Probability(pre-frailty) (FRAIL): DSR: 0.35<sup>\*\*\*</sup>, CI = 0.32–0.38; Non-DSR: 0.25<sup>\*\*\*</sup>, CI = 0.24–0.26; \*  $p < 0.05$ , \*\*  $p < 0.01$ , and \*\*\*  $p < 0.001$ . *Source:* the author.

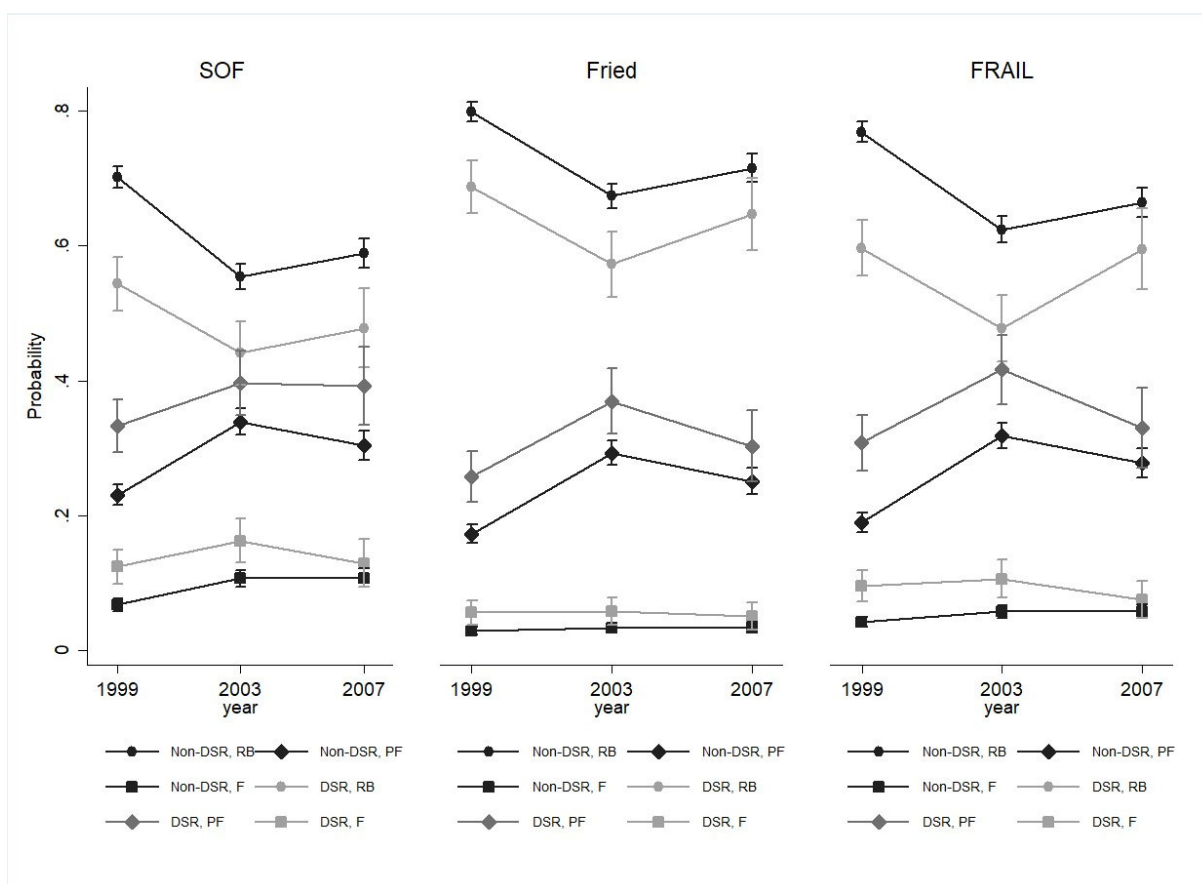

**Figure S2.** The temporal effects of DSR on the probability of the robust, pre-frailty, and frailty group among middle-aged and older adults, Taiwan, 1999–2007

*Note:* All results were based on random-effects panel logit model. The data points represent the mean  $\pm$  standard error. AOR: adjusted odds ratio; DSR: dietary sodium restriction. Probability(pre-frailty) (SOF): DSR, 1999: 0.33<sup>\*\*\*</sup>, CI = 0.29–0.37; Non-DSR, 1999: 0.23<sup>\*\*\*</sup>, CI = 0.22–0.25; DSR, 2003: 0.40<sup>\*\*\*</sup>, CI = 0.35–0.44; Non-DSR, 2003: 0.34<sup>\*\*\*</sup>, CI = 0.32–0.36; DSR, 2007: 0.39<sup>\*\*\*</sup>, CI = 0.33–0.45; Non-DSR, 2007: 0.30<sup>\*\*\*</sup>, CI = 0.28–0.33; Probability(pre-frailty) (Fried): DSR, 1999: 0.26<sup>\*\*\*</sup>, CI = 0.22–0.30; Non-DSR, 1999: 0.17<sup>\*\*\*</sup>, CI = 0.16–0.19; DSR, 2003: 0.37<sup>\*\*\*</sup>, CI = 0.32–0.42; Non-DSR, 2003: 0.29<sup>\*\*\*</sup>, CI = 0.27–0.31; DSR, 2007: 0.30<sup>\*\*\*</sup>, CI = 0.25–0.36; Non-DSR, 2007: 0.25<sup>\*\*\*</sup>, CI = 0.23–0.27; Probability(pre-frailty) (FRAIL): DSR, 1999: 0.31<sup>\*\*\*</sup>, CI = 0.27–0.35; Non-DSR, 1999: 0.19<sup>\*\*\*</sup>, CI = 0.17–0.20; DSR, 2003: 0.42<sup>\*\*\*</sup>, CI = 0.37–0.47; Non-DSR, 2003: 0.32<sup>\*\*\*</sup>, CI = 0.30–0.34; DSR, 2007: 0.33<sup>\*\*\*</sup>, CI = 0.27–0.39; Non-DSR, 2007: 0.28<sup>\*\*\*</sup>, CI = 0.26–0.30; \*  $p < 0.05$ , \*\*  $p < 0.01$ , and \*\*\*  $p < 0.001$ . *Source:* the author.

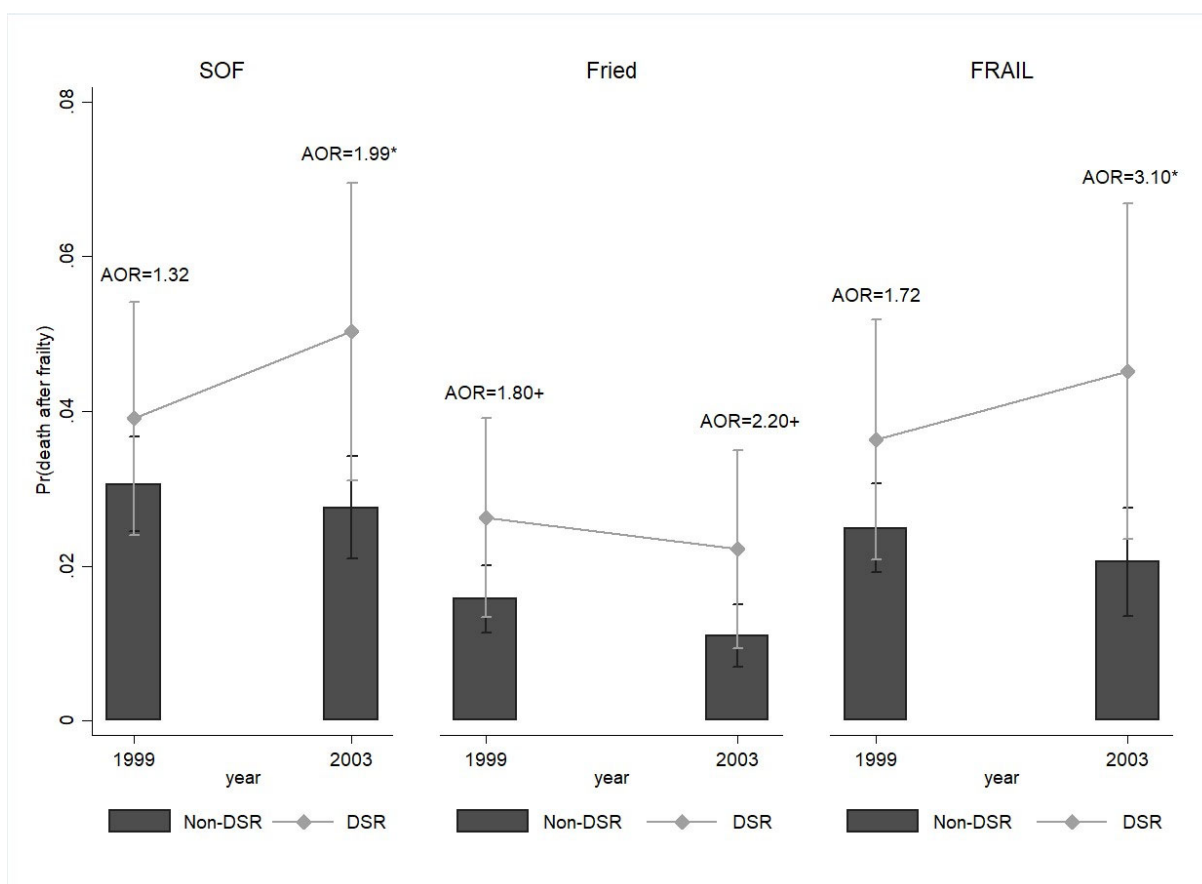

**Figure S3.** The temporal effects of DSR on the probability of death after frailty among middle-aged and older adults, Taiwan, 1999–2007

*Note:* All results were based on random-effects panel logit model. The data points represent the mean  $\pm$  standard error. Pr(death after frailty): the predicted probability of frailty; AOR: adjusted odds ratio; DSR: dietary sodium restriction. Pr(death after frailty) (SOF): DSR, 1999–2003: 0.04<sup>\*\*\*</sup>, CI = 0.02–0.05; Non-DSR, 1999–2003: 0.03<sup>\*\*\*</sup>, CI = 0.02–0.04; DSR, 2003–2007: 0.05<sup>\*\*\*</sup>, CI = 0.03–0.07; Non-DSR, 2003–2007: 0.03<sup>\*\*\*</sup>, CI = 0.02–0.03; Pr(death after frailty) (Fried): DSR, 1999–2003: 0.03<sup>\*\*\*</sup>, CI = 0.01–0.04; Non-DSR, 1999–2003: 0.02<sup>\*\*\*</sup>, CI = 0.01–0.02; DSR, 2003–2007: 0.02<sup>\*\*\*</sup>, CI = 0.01–0.03; Non-DSR, 2003–2007: 0.01<sup>\*\*\*</sup>, CI = 0.01–0.02; Pr(death after frailty) (FRAIL): DSR, 1999–2003: 0.04<sup>\*\*\*</sup>, CI = 0.02–0.05; Non-DSR, 1999–2003: 0.02<sup>\*\*\*</sup>, CI = 0.02–0.03; DSR, 2003–2007: 0.05<sup>\*\*\*</sup>, CI = 0.02–0.07; Non-DSR, 2003–2007: 0.02<sup>\*\*\*</sup>, CI = 0.01–0.03; <sup>+</sup>  $p < 0.1$ , <sup>\*</sup>  $p < 0.05$ , <sup>\*\*</sup>  $p < 0.01$ , and <sup>\*\*\*</sup>  $p < 0.001$ . *Source:* the author.

## Tables

**Table S1.** Robustness check: predictors of dietary sodium restriction that may influence frailty among older adults in Taiwan, 1999–2007

|                                  | Model 1 <sup>a</sup>               | Model 2 <sup>b</sup>              | Model 3 <sup>c</sup>              | Model 4 <sup>a</sup>                | Model 5 <sup>b</sup>                |
|----------------------------------|------------------------------------|-----------------------------------|-----------------------------------|-------------------------------------|-------------------------------------|
|                                  | Frailty (SOF)<br>(reference=“no”)  | Frailty (SOF)<br>(reference=“no”) | Frailty (SOF)<br>(reference=“no”) | Frailty (Fried)<br>(reference=“no”) | Frailty (Fried)<br>(reference=“no”) |
|                                  | Yes                                | Yes                               | Yes                               | Yes                                 | Yes                                 |
|                                  | AOR (95% CI)                       | AOR (95% CI)                      | AOR (95% CI)                      | AOR (95% CI)                        | AOR (95% CI)                        |
| Dietary Sodium Restriction (DSR) |                                    |                                   |                                   |                                     |                                     |
| No                               | REF                                | REF                               | REF                               | REF                                 | REF                                 |
| Yes                              | 2.59 (2.05 , 3.28)*** <sup>d</sup> | 2.13 (1.47 , 3.10)***             | 1.73 (1.38 , 2.18)***             | 2.37 (1.75 , 3.22)***               | 3.07 (1.38 , 6.80)**                |
| DSR × Year 1999                  |                                    |                                   |                                   |                                     |                                     |
| 1999, Non-DSR                    | REF                                | REF                               | REF                               | REF                                 | REF                                 |
| 1999, DSR                        | 3.29 (2.32 , 4.66)***              | 2.68 (1.53 , 4.70)***             | 2.20 (1.54 , 3.14)***             | 2.77 (1.71 , 4.49)***               | 3.99 (1.37 , 11.61)*                |
| DSR × Year 2003                  |                                    |                                   |                                   |                                     |                                     |
| 2003, Non-DSR                    | REF                                | REF                               | REF                               | REF                                 | REF                                 |
| 2003, DSR                        | 2.42 (1.67 , 3.51)***              | 2.83 (1.64 , 4.90)***             | 1.73 (1.21 , 2.48)**              | 2.37 (1.41 , 4.00)**                | 3.09 (0.94 , 10.22) <sup>+</sup>    |
| DSR × Year 2007                  |                                    |                                   |                                   |                                     |                                     |
| 2007, Non-DSR                    | REF                                | REF                               | REF                               | REF                                 | REF                                 |
| 2007, DSR                        | 1.81 (1.15 , 2.86)*                | 0.82 (0.36 , 1.88)                | 1.24 (0.80 , 1.91)                | 1.86 (1.04 , 3.32)*                 | 1.87 (0.46 , 7.59)                  |

*Note:* AOR, adjusted odds ratio; CI, confidence interval; REF, reference groups. Individual-level characteristics were set as control variables. These included gender, age, education level, marital status, current living status, smoking status, alcohol intake, and frequency of exercise. <sup>a</sup> The outcome variable was categorized into three distinct three different groups. <sup>b</sup> Individuals were excluded from analysis if they were diagnosed with hypertension and treated (or medicated) by a doctor in 1999. <sup>c</sup> Individuals were excluded from analysis if they were diagnosed with chronic kidney disease and treated (or medicated) by a doctor in 1999. <sup>d+</sup>  $p < 0.1$ , \*  $p < 0.05$ , \*\*  $p < 0.01$ , and \*\*\*  $p < 0.001$ .

**Table S1.** Robustness check: continue

|                                  | Model 6 <sup>c</sup>                | Model 7 <sup>a</sup>                | Model 8 <sup>b</sup>                | Model 9 <sup>c</sup>                | Model 10 <sup>d</sup>             |
|----------------------------------|-------------------------------------|-------------------------------------|-------------------------------------|-------------------------------------|-----------------------------------|
|                                  | Frailty (Fried)<br>(reference="no") | Frailty (FRAIL)<br>(reference="no") | Frailty (FRAIL)<br>(reference="no") | Frailty (FRAIL)<br>(reference="no") | SBF<br>(reference="no")           |
|                                  | Yes                                 | Yes                                 | Yes                                 | Yes                                 | Yes                               |
|                                  | AOR (95% CI)                        | AOR (95% CI)                        | AOR (95% CI)                        | AOR (95% CI)                        | AOR (95% CI)                      |
| Dietary Sodium Restriction (DSR) |                                     |                                     |                                     |                                     |                                   |
| No                               | REF                                 | REF                                 | REF                                 | REF                                 | REF                               |
| Yes                              | 2.50 (1.57 , 3.98) <sup>***c</sup>  | 3.14 (2.39 , 4.13) <sup>***</sup>   | 2.51 (1.38 , 4.59) <sup>**</sup>    | 2.47 (1.72 , 3.56) <sup>***</sup>   | 2.70 (1.63 , 4.48) <sup>***</sup> |
| DSR × Year 1999                  |                                     |                                     |                                     |                                     |                                   |
| 1999, Non-DSR                    | REF                                 | REF                                 | REF                                 | REF                                 | REF                               |
| 1999, DSR                        | 2.61 (1.34 , 5.07) <sup>**</sup>    | 4.33 (2.86 , 6.54) <sup>***</sup>   | 4.06 (1.74 , 9.47) <sup>**</sup>    | 3.06 (1.81 , 5.18) <sup>***</sup>   | 2.19 (1.08 , 4.42) <sup>*</sup>   |
| DSR × Year 2003                  |                                     |                                     |                                     |                                     |                                   |
| 2003, Non-DSR                    | REF                                 | REF                                 | REF                                 | REF                                 | REF                               |
| 2003, DSR                        | 2.81 (1.38 , 5.70) <sup>**</sup>    | 3.26 (2.07 , 5.13) <sup>***</sup>   | 2.71 (1.09 , 6.73) <sup>*</sup>     | 2.80 (1.61 , 4.85) <sup>***</sup>   | 4.22 (2.00 , 8.90) <sup>***</sup> |
| DSR × Year 2007                  |                                     |                                     |                                     |                                     |                                   |
| 2007, Non-DSR                    | REF                                 | REF                                 | REF                                 | REF                                 | REF                               |
| 2007, DSR                        | 2.03 (0.92 , 4.49) <sup>+</sup>     | 1.65 (0.95 , 2.87) <sup>+</sup>     | 0.96 (0.29 , 3.14)                  | 1.43 (0.73 , 2.81)                  | 1.94 (0.76 , 4.93)                |

*Note:* AOR, adjusted odds ratio; CI, confidence interval; REF, reference groups. Individual-level characteristics were set as control variables. These included gender, age, education level, marital status, current living status, smoking status, alcohol intake, and frequency of exercise. <sup>a</sup> The outcome variable was categorized into three distinct three different groups. <sup>b</sup> Individuals were excluded from analysis if they were diagnosed with hypertension and treated (or medicated) by a doctor in 1999. <sup>c</sup> Individuals were excluded from analysis if they were diagnosed with chronic kidney disease and treated (or medicated) by a doctor in 1999. <sup>d</sup> The study used an alternative measure to lower limb muscle strength, which is one component of the SBF scale. <sup>e+</sup>  $p < 0.1$ , <sup>\*</sup>  $p < 0.05$ , <sup>\*\*</sup>  $p < 0.01$ , and <sup>\*\*\*</sup>  $p < 0.001$ .
